1 **RNA-Seq Analysis Illuminates the Early Stages of *Plasmodium* Liver Infection**

2 Maria Toro-Moreno<sup>a,\*</sup>, Kayla Sylvester<sup>b,\*</sup>, Tamanna Srivastava<sup>a</sup>, Dora Posfai<sup>b</sup>, and

3 Emily R. Derbyshire<sup>a,b,#</sup>

4

5

6

7

8

9

10

11

12

13

14

15

16

17

18 <sup>a</sup> Department of Chemistry, Duke University, Durham, NC, USA

19 <sup>b</sup> Department of Molecular Genetics and Microbiology, Duke University, Durham, NC, USA

20

21 Running Head: *Plasmodium* liver stage transcriptome

22 #Address correspondence to Emily R. Derbyshire, [emily.derbyshire@duke.edu](mailto:emily.derbyshire@duke.edu).

23 \*Authors contributed equally.

## 24 **ABSTRACT**

25           The apicomplexan parasites *Plasmodium* spp. are the causative agents of malaria, a disease  
26 that poses a significant global health burden. *Plasmodium* spp. initiate infection of the human host  
27 by transforming and replicating within hepatocytes. This liver stage (LS) is poorly understood  
28 when compared to other *Plasmodium* life stages, which has hindered our ability to target these  
29 parasites for disease prevention. We conducted an extensive RNA-seq analysis throughout the  
30 *Plasmodium berghei* LS, covering as early as 2 hours post infection (hpi) and extending to 48 hpi.  
31 Our data revealed that hundreds of genes are differentially expressed at 2 hpi, and that multiple  
32 genes shown to be important for later infection are upregulated as early as 12 hpi. Using  
33 hierarchical clustering along with co-expression analysis, we identified clusters functionally  
34 enriched for important liver-stage processes such as interactions with the host cell and redox  
35 homeostasis. Furthermore, some of these clusters were highly correlated to the expression of  
36 ApiAP2 transcription factors, while showing enrichment of mostly uncharacterized DNA binding  
37 motifs. This finding presents potential LS targets for these transcription factors, while also hinting  
38 at alternative uncharacterized DNA binding motifs and transcription factors during this stage. Our  
39 work presents a window into the previously undescribed transcriptome of *Plasmodium* upon host  
40 hepatocyte infection to enable a comprehensive view of the parasite's LS. These findings also  
41 provide a blueprint for future studies that extend hypotheses concerning LS gene function in *P.*  
42 *berghei* to human-infective *Plasmodium* parasites.

43

## 44 **IMPORTANCE**

45           The LS of *Plasmodium* infection is an asymptomatic yet necessary stage for producing  
46 blood-infective parasites, the causative agents of malaria. Blocking the liver stage of the life cycle

47 can prevent clinical malaria, but relatively less is known about the parasite's biology at this stage.  
48 Using the rodent model *P. berghei*, we investigated whole-transcriptome changes occurring as  
49 early as 2 hpi of hepatocytes. The transcriptional profiles of early time points (2, 4, 12, and 18 hpi)  
50 have not been accessible before due to the technical challenges associated with liver-stage  
51 infections. Our data now provides insights into these early parasite fluxes that may facilitate  
52 establishment of infection, transformation and replication in the liver.

53

## 54 INTRODUCTION

55 *Plasmodium* spp., the causative agents of malaria, are eukaryotic parasites with a largely  
56 conserved and complex life cycle that begins in the mammalian host by invasion of hepatocytes.  
57 In these host cells, a single parasite, termed a sporozoite, will transform and then replicate  
58 asexually to form thousands of merozoites, or blood-infective forms (1). After maturation and  
59 release from the liver, parasites replicate within erythrocytes causing the clinical manifestation of  
60 malaria. Some parasites differentiate into sexual forms (gametocytes) that are ingested by an  
61 *Anopheles* mosquito during a blood meal. In the mosquito, female and male gametocytes undergo  
62 sexual reproduction, and a series of developmental changes lead to a transformation into  
63 sporozoites. Inoculation of these sporozoites in the host via a mosquito bite perpetuates the life  
64 cycle (2). Despite the significant global burden of malaria (3), our molecular understanding of the  
65 *Plasmodium* life cycle is incomplete, hindering our ability to target these parasites to prevent  
66 disease and reduce transmission. In particular, the changes that enable sporozoites to transform  
67 and then develop within hepatocytes are largely unknown.

68

69 Transcriptomic studies have been instrumental in revealing gene expression variation that  
70 accompanies stage transitions and developmental processes in *Plasmodium*. Subsequent analyses  
71 of these data have also identified transcription factors that are critical for controlling parasite  
72 progression at various stages (reviewed in (4)). Yet, only a handful of transcriptome analyses have  
73 been completed in the LS relative to other parasite forms, likely owing to the technical challenges  
74 associated with studying this stage. Still, these studies have provided important insight into LS-  
75 specific biological processes (5), including hypnozoite markers (6, 7), through comparative gene  
76 expression analysis with other stages (8), even at single-cell resolution (9). These studies examined  
77 gene expression upon the establishment of a LS-trophozoite (24 hours post-infection and  
78 thereafter); however, the early stages of LS infection (0–24 hours post-infection) for any  
79 *Plasmodium* species remains unresolved.

80 Our current understanding of the early stages of LS development comes from  
81 ultrastructural (10) and immunofluorescence (11) studies. Upon traversal and invasion of  
82 hepatocytes, rod-shaped sporozoites expulse unnecessary organelles into the parasitophorous  
83 vacuole (PV), which is accompanied by the formation of a protrusion, a bulbous expansion and a  
84 transformation into a spherical, replication-competent trophozoite (10). Although this  
85 metamorphosis is obvious at the cellular level, the molecular events underpinning this sequence of  
86 events remain obscure. Previous studies have examined the gene expression of sporozoites grown  
87 axenically since sporozoites can complete this transformation extracellularly if activated by BSA,  
88 calcium, and a temperature shift (12, 13). Yet, axenically-grown sporozoites show reduced  
89 viability and poor developmental capacity compared to intracellular parasites, suggesting an  
90 important role of host pathways in this process. Indeed, a recent study showed that activation of  
91 the host GPCR CXCR-4 is necessary for proper parasite metamorphosis (11), highlighting the

92 need to study parasite transformation, and all its subsequent development, in the context of the  
93 host cell.

94 Here, we present a transcriptomic survey of the early and mid-liver stages of *P. berghei*  
95 infecting human hepatoma cells. The rodent *P. berghei* and *P. yoelii* LS models are routinely used  
96 to study this stage due to their genetic accessibility and tractability relative to human-infective  
97 counterparts. Our dataset includes seven timepoints, from 2 to 48 hours post-infection (hpi),  
98 making it the most comprehensive transcriptomic analysis of the *Plasmodium* LS to date. We  
99 describe changes in gene expression associated with the early stages of *Plasmodium* intracellular  
100 development in the LS and show that upregulation of most genes important for exo-erythrocytic  
101 form (EEF) maturation occurs as early as 12 hpi. This finding suggests genes important for late-  
102 LS development are subject to dynamic expression or translational repression until protein  
103 expression is necessary. Furthermore, using co-expression analysis we identified functionally  
104 enriched gene clusters with distinct expression patterns and discovered dozens of potential  
105 regulatory DNA motifs associated with these genes. Overall, our work completes the life cycle of  
106 this important model organism, *P. berghei*, from the transcriptomic perspective, providing a  
107 resource for exploring stage-specific expression of genes, and thus providing insight into  
108 *Plasmodium* biology.

109

## 110 **RESULTS**

111 **RNA-Seq of Early- and Mid-*P. berghei* Liver Stages.** During the course of the LS, sporozoites  
112 undergo morphological changes and rapid replication. To investigate differentially expressed  
113 transcripts that flux during this stage, HuH7 or HepG2 hepatoma cells were infected with GFP-  
114 expressing *P. berghei* ANKA sporozoites. At various times post-infection, samples were

115 harvested, and 1000–3000 *P. berghei*-infected cells were collected by FACS (**Figure 1A**). A poor  
116 understanding exists for the early- and mid-LS, therefore greater sampling was acquired before 24  
117 hpi at 2, 4, 12 and 18 hpi (early). Previously analyzed mid-LS samples at 24 and 48 hpi were  
118 collected to enable comparison to other studies, as well as 36 hpi, which has not been previously  
119 evaluated. *Plasmodium* infection in liver cells is highly heterogenous, with ~ 50% of sporozoites  
120 that invade liver cells failing to establish productive infections (14, 15). We ensured selection of  
121 populations enriched for productive infections within viable host cells by isolating cells that are  
122 both infected and have an uncompromised membrane (GFP<sup>+</sup> Sytox Blue<sup>-</sup>). FACS analysis indicates  
123 that the population of infected cells (GFP-positive) shifts as a function of time, consistent with  
124 proper intrahepatic parasite maturation (**Figure 1B**). Further, our gating excluded unviable host  
125 cells (Sytox Blue-positive). In our method, we sorted directly into lysis buffer. RNA was then  
126 extracted in each sample using the Clontech kit for ultra-low input RNA. Samples were evaluated  
127 for concentration and quality using a Qubit and Bioanalyzer, respectively, and analyzed by RNA-  
128 seq if they met quality controls. To facilitate robust analysis, sample collection continued until a  
129 minimal of 3 replicates per time point were acquired, which yielded a final range of 3–8 replicates.

130 All samples were aligned to *H. sapiens* and *P. berghei* for analysis. As parasite nuclear  
131 division does not occur until mid-LS, <4% of the reads mapped to *P. berghei* before 24 hpi. This  
132 percentage rises continuously during mid-LS, when the parasite undergoes nuclear division and  
133 by 48 hpi ~45 % of the reads correspond to *P. berghei* (**Figure 1C**). In this report, we are focused  
134 on parasite processes that control development within hepatocytes, thus principal component  
135 analysis (PCA) was completed on *P. berghei* data after removal of batch effects. PCA revealed no  
136 major differences between the parasite transcriptomes obtained by infecting HepG2 or Huh7 cells  
137 (**Figure S1A**), but a general clustering of replicates by genotype (timepoint) was observed (**Figure**

138 **S1B**). Of note, PCA showed strong separation of 4 hpi and 2 hpi, with the latter grouping well with  
139 sporozoites, highlighting the parasite transformations that must occur during these 2 hours.

140 To analyze our dataset in the context of the entire *Plasmodium* life cycle, we calculated  
141 Spearman correlations on our data as well as previously published *Plasmodium* transcriptomic data  
142 from sporozoites, the asexual blood stage (ABS), gametocytes, ookinetes, hypnozoites and the LS  
143 (**Table S1**). This analysis spanned data obtained from *P. berghei*, *P. yoelii*, *P. cynomolgi*, *P. vivax*  
144 and *P. falciparum*. Consistent with previous reports, the LS was more similar to the asexual blood  
145 stage (ABS) than to gametocytes and ookinetes (8). Indeed, we observe two general groups  
146 comprising of 1) mostly metabolically active, intracellular stages (LS, ABS), and 2) mostly motile,  
147 extracellular stages (**Figure 2**). Notably, early liver stages of *P. berghei* and (axenic) *P. vivax*  
148 (LS\_2h/4h) fell into the latter group, being more highly correlated to sporozoites, ookinetes and  
149 gametocytes than to other LS time points.

150

151 **Early Liver-Stage Transcriptome of *P. berghei***. Thousands of statistically significant  
152 differentially expressed transcripts were detected at early LS time points, with most of these  
153 transcripts being downregulated at 2 and 4 hpi, and then upregulated at 12 hpi with respect to  
154 sporozoites (**Figure 3A and B, Data S1**). This shift suggests a change from gene suppression to  
155 activation as the parasite exits the early stage of intrahepatic development. As expected, genes  
156 important for host cell traversal and invasion, such as *CELTOS*, *SUB2*, and *CSP*, were  
157 downregulated at 2 hpi, concurrent with upregulation of genes important for nutrient acquisition  
158 (*ZIP1*, *TPT*, *NTI*), reflecting the establishment of the infection in the host cell. Unsurprisingly, at  
159 these early stages, we also observe strong upregulation of *EXP2* and *PV2*, which encode PVM-  
160 associated proteins, together with several predicted exported proteins with unknown function,

161 indicating that early (<4 hpi) establishment and remodeling of the PVM is essential for parasite  
162 LS maturation. Interestingly, we observe that *LYTB* (IspH), the last enzyme in the isoprenoid  
163 biosynthesis pathway in the apicoplast, is among the most upregulated genes at both 2 and 4 hpi  
164 (**Table S2**). Apicoplast pathways are important potential drug targets for the development of LS  
165 antimalarials, but are not known to be involved in early-LS processes.

166 Translational regulation of *Plasmodium* transcripts has been extensively documented and  
167 it is known to play a pivotal role during developmental transitions in the life cycle. We found  
168 pervasive upregulation of most of the functionally characterized translational regulators in  
169 *Plasmodium*, at the exclusion of *PUF1* and *PUF2*, which appeared to be dramatically  
170 downregulated when compared to their high expression in sporozoites. *DOZI*, *ALBA1*, *ALBA2* and  
171 *ALBA4* were upregulated as early as 4 hpi ( $\text{Log}_2\text{FC} < 2$ ,  $q < 0.01$ ) (**Figure S2**). Moreover, among  
172 the highest differentially expressed transcripts at 2 and 4 hpi, there was an enrichment of genes  
173 involved in RNA-protein complexes and interactions, such as *SRI*, *NOP10*, *CBF5*, *RPS12*, *NAPL*  
174 (**Table S3**). Thus, translational regulation likely plays an important role in the early stages of  
175 *Plasmodium* infection of the liver.

176 At ~24 hpi and thereafter, the single-nucleated trophozoites replicate and subsequently  
177 mature into LS schizonts, each harboring tens of thousands of nuclei. Previous work examining  
178 the LS stage transcriptome at these mid-stages identified hundreds of differentially expressed  
179 genes involved in translation, metabolism, protein trafficking and redox processes (5, 8). Since we  
180 saw a strong correlation between 12 hpi and mid-liver stages (Spearman correlation = 0.837—  
181 0.949, **Figure 2**), we questioned how early a statistically significant upregulation of the core mid-  
182 LS transcriptome could be observed in our dataset. We found 1,197 genes in our dataset that are  
183 significantly upregulated at 24, 36 and 48 hpi compared to sporozoites ( $q < 0.01$ ), constituting



184 about 20% of the *P. berghei* genome (**Figure 3A and B**). Interestingly, we find that 87% of  
185 transcripts that are upregulated throughout the mid-liver stages (24 hpi through 48 hpi) are  
186 upregulated as early as 12 hpi (**Figure 3C**). More specifically, 50% of the genes that are  
187 upregulated in the mid-liver stages are first observed to be upregulated at 12 hpi (**Figure 3D**).

188

189 **Co-Expression Analysis Identifies Functionally Enriched Gene Clusters.** To identify co-  
190 expression patterns that may inform future functional studies, we performed a clustering analysis  
191 of the k-means for all differentially expressed genes for all of the samples included in our dataset.  
192 Fourteen clusters emerged from this hierarchical clustering analysis (**Figure 4A, Data S2**). These  
193 clusters could be further grouped within three major co-expression patterns when columns were  
194 grouped by sample genotype (timepoint). The first major cluster group (clusters 3, 11 and 13)  
195 includes genes that are upregulated early during infection (spz, 2 and 4 hpi) and are generally  
196 downregulated throughout the rest of LS infection, such as *ETRAMPs* and *SPELD*. The second  
197 major cluster group (clusters 1, 2, 4, 7, 8, 9, 12, and 14) includes genes that are downregulated  
198 during the early stages of infection, but are then consistently upregulated from 24 to 48 hpi. The  
199 third major cluster group (clusters 5, 6, and 10) includes genes that are upregulated throughout the  
200 entire LS.

201 To investigate possible enrichment of biological processes of co-expressed genes, we  
202 analyzed each cluster by gene ontology (GO). Such analyses revealed the enrichment of various  
203 GO terms for each of the clusters ( $p < 0.01$ ). We prioritized clusters for which at least one GO  
204 term was enriched by a  $p$ -adj (Bonferroni)  $< 0.01$ . Cluster 3 stood out as highly enriched despite  
205 142 out of the total 248 genes in this cluster not being annotated. For this cluster, enrichment  
206 analysis indicated significant enrichment of “interspecies interaction” (GO:0044419,  $p < 1.91E-$

207 07) as well as locomotion (GO:0040011,  $p < 0.0005679$ ) and signal transduction (GO:0007165,  $p$   
208  $< 0.00049572$ ) (**Figure 4B**). Genes in this cluster are highly expressed in sporozoites, and thus  
209 appear to be strongly downregulated during infection (**Figure 4C**). In agreement with this result,  
210 this cluster includes genes that have been previously shown to play an important role during  
211 invasion (*CELTOS*, *SPECT1*, *TRAP*), interactions with the host liver cell (*UIS3*, *UIS4*, *CSP*, *p36*,  
212 *p52*), and translational control of liver-stage specific transcripts (*UIS2*, *PUF1*, *PUF2*) (16).

213 Cluster 14 was enriched for “oxidation-reduction process” (GO:0055114,  $p < 9.01E-05$ ),  
214 “DNA replication” (GO:0006260,  $p < 0.00164223$ ), and “intracellular protein transport”  
215 (GO:0006886,  $p < 0.00941436$ ) (**Figure 4B**). In this group, genes involved in redox-regulatory  
216 processes (*FNR*, *TRX-PX2*), as well as biosynthetic genes such as *G3PDH*, can be found.  
217 Expression of genes under the redox group appears to peak by ~12 hpi and then remains stably  
218 upregulated throughout infection. This expression pattern highlights the need for this machinery  
219 to mitigate potential stress due to the dramatic parasite replication and growth that is initiated at  
220 ~24 hpi (**Figure 4C**). Little is known about redox biology in *Plasmodium* parasites, particularly  
221 during the LS, but these processes have historically been key pathways for drug discovery. Indeed,  
222 atovaquone, a drug for malaria prophylaxis in combination with proguanil, inhibits liver stage  
223 parasites in vitro by impairing mitochondrial redox metabolism via targeting the cytochrome *bc*<sub>1</sub>  
224 complex (17). This dataset may serve as a starting point to discover more LS targets involved in  
225 redox metabolism. Furthermore, although not enriched in our GO analysis, we observed that  
226 several important liver-specific genes are found in this cluster, such as *IBIS1*, *LISP1*, and *LISP2*.  
227 Finally, in cluster 6, we saw enrichment of core functions such as “gene expression” (GO:0010467,  
228  $p < 5.71E-05$ ) and “RNA processing” (GO:0006396,  $p < 5.98E-06$ ), which contains 656 genes. As  
229 expected of housekeeping functions, these genes appear to be expressed throughout LS infection.

230 Our analysis identified several clusters with enriched GO terms, some which accurately  
231 describe the known LS biology at different timepoints. Although GO enrichment provided a useful  
232 assessment of differentially expressed processes, we note that it is limited in its reach in  
233 *Plasmodium* when compared to other model organisms since ~40% of the genome remains  
234 unannotated. Hence, to further explore the composition of these co-expression clusters, we made  
235 use of the Rodent Malaria genetically modified parasite database (RMgmDB) to provide  
236 phenotypic information about our clusters throughout the life cycle (18). Interestingly, we observe  
237 that while most clusters have a high proportion of genes for which disruption resulted in  
238 phenotypes across the entire life cycle, only a few clusters had genes that displayed phenotypes  
239 exclusively in sporozoite and/or liver stage (**Figure S3**). Specifically, clusters 3 and 14 had the  
240 highest percentage of spz/LS-specific genes (13 and 9%, respectively), reinforcing the potential  
241 for identifying new LS drug and vaccine targets within these clusters.

242

243 **Expression Dynamics of AP2 Transcription Factors.** Transcriptional regulation of gene  
244 expression has been extensively studied in the intraerythrocytic developmental cycle (IDC) and  
245 mosquito stages of *P. berghei* and *P. falciparum*. The AP2 transcription factors (TFs), comprised  
246 of 26 genes in *P. berghei*, are the best-characterized family of TFs in apicomplexans (**Figure 5A**).  
247 AP2s are known to regulate *Plasmodium* transitions into different developmental stages and have  
248 emerged as key factors leading to both sexual commitment and sex differentiation (reviewed in  
249 (4)). Unsurprisingly, we observe that AP2 genes with established functions in mosquito stages  
250 (*AP2-O*, *AP2-O2*) and those involved in sporozoite development (*AP2-SPs*) are downregulated  
251 throughout the liver stages (**Figure 5A**). The only ApiAP2 TF known to play a role in LS  
252 development is *AP2-L*. *AP2-L* (-/-) parasites are able to traverse and invade liver cells, but arrest

253 in the schizont stage (19). *AP2-L* transcripts are abundant in sporozoites and thus appear to be  
254 strongly downregulated during infection, as early as 2 hpi (**Figure 5A**).

255 We observe strong upregulation (~3-fold) of *AP2-G2* at 2 and 4 hpi. *AP2-G2* has been  
256 shown to act as a repressor during the BS and gametocyte development, and to have different  
257 targets during these stages (20, 21). A group of such targets corresponds to the liver-specific genes  
258 *LISPI* and *TREP*, which are important for LS schizont maturation and expressed during late LS  
259 infection (21). Interestingly, we observe that *AP2-G2* expression is negatively correlated to the  
260 average expression of the main clusters harboring this set of genes, including clusters 1, 9 and 14  
261 (**Data S3**). Thus, it is plausible that during the first hours of infection, *AP2-G2* acts as a repressor  
262 of genes involved in later stages of LS development, many of which remain uncharacterized.

263 Interestingly, we observed significant upregulation of the uncharacterized ApiAP2s  
264 PBANKA\_0835200 and PBANKA\_0109500 throughout the LS starting at 12 hpi, in contrast to  
265 the early upregulation of *AP2-G2*. While still functionally uncharacterized, their orthologs in *P.*  
266 *falciparum* have been recently shown to co-express during differentiation in gametocytogenesis,  
267 and to be inversely correlated to genes involved in ABS development. This expression pattern  
268 suggests they may have a role as co-repressors of genes involved in the ABS (22). In our dataset,  
269 we observe a strong correlation with clusters 11, 12 (both negative) and cluster 8 (positive).

270 We sought to identify enriched DNA motifs in each of the co-expression clusters by  
271 analyzing the 5' UTR sequences (1 kb) of their genes against the upstream sequence for all of the  
272 genes in other clusters using DREME (**Data S3**) (23). While genes in clusters 1, 2, 5 and 13 lacked  
273 any enriched DNA motifs, *de novo* discovery uncovered hundreds of DNA motifs in the remaining  
274 clusters, with the topmost enriched motif shown in **Figure 5B**. We found that the most significant  
275 motif in cluster 12 (T[G/C]TAACA) matched the motif recognized by ApiAP2

276 PBANKA\_0521700 (GTGTTACAC,  $p < 1.28e-05$ ). This cluster included genes that are mostly  
277 downregulated throughout the LS until the later time points in our time series, such as the BS  
278 schizont-specific genes *SERA2* and *SERA3*. Additionally, PBANKA\_0521700 expression was  
279 strongly correlated to cluster 12 ( $r = 0.83$ ,  $p < 0.021$ ), suggesting this cluster might harbor  
280 previously unknown targets of this ApiAP2 (**Figure 5B**).

281

## 282 **DISCUSSION**

283 Our data provide novel insights into gene expression fluxes throughout *Plasmodium*  
284 development within hepatocytes. The transcriptional blueprints provided by our time series  
285 enables comparison of early-, mid- and late-liver stage parasite processes for the first time. We  
286 found 146 genes exclusively upregulated early, such as *EIF5*; and 482 genes, including *SERA1*  
287 and *LISP2*, exclusively upregulated in the mid-liver stages (**Figure S4**). Furthermore, our datasets  
288 recapitulated well-established gene expression patterns of key LS genes, and overall were largely  
289 in agreement with recently reported datasets, supporting the validity of our approach. Through our  
290 analysis, we identified a key shift in parasite gene expression that occurs at 12 hpi, and the role of  
291 transcription factors in driving LS maturation. Specifically, we explored potential transcriptional  
292 regulation of co-expressing genes by analyzing their upstream sequences for enrichment of  
293 potential DNA binding motifs, and their correlation to *P. berghei* AP2 transcription factors. Our  
294 results revealed an association between the uncharacterized PBANKA\_0521700 AP2 TF and  
295 cluster 12. PBANKA\_0521700 is preferentially expressed in the ring stages of the IDC and is  
296 refractory to disruption in the BS (24, 25), hampering functional studies of this gene. Our data, in  
297 conjunction with previously reported *P. berghei* RNA-seq (8, 24–26) and single cell studies

298 covering the entire life cycle (9), could be useful to refine hypotheses about the functions and  
299 targets of this TF as well as other AP2 TFs.

300 While AP2 TFs have been at the center of gene expression studies in *Plasmodium*, novel  
301 “omics” approaches have begun uncovering other layers of gene regulation. Indeed, post-  
302 transcriptional regulation, such as *N*<sup>6</sup>-methyladenosine (m<sup>6</sup>A) of mRNA and alternative splicing,  
303 have recently been recognized as essential for fine-tuning gene expression in blood and sexual  
304 stages (27, 28). In particular, disruption of the splicing factor *PbSR-MG* was shown to perturb sex-  
305 specific alternative splicing, thus demonstrating its role as a cellular differentiation regulator (29).  
306 Interestingly, we observed a dramatic upregulation of the splicing factor SR1 coinciding with the  
307 parasite’s metamorphoses in the LS, hinting at an important role for alternative splicing during this  
308 stage. Future reverse genetic studies may help establish a role for alternative splicing in the LS.

309 A well-documented form of gene expression regulation in *Plasmodium* occurs at the  
310 translational level. Translational repression (TR) of hundreds of transcripts has been reported at  
311 most stages of the *P. berghei* life cycle (30). TR is particularly pervasive in the sporozoite  
312 transition from the mosquito to the mammalian host (31, 32). During this transition, hundreds of  
313 transcripts that are highly expressed in sporozoites are stored in mRNA granules, until infection  
314 of the host relieves this repression resulting in protein translation. The extent to which a TR  
315 program operates in the LS is currently unknown. However, we observed that ~50% of all  
316 transcripts upregulated after 24 hpi are also upregulated at 12 hpi, including some with known  
317 roles in LS schizont maturation (*IBIS1* and *BP2*). Furthermore, we see upregulation of several  
318 known translation regulators *DOZI*, *ALBA1,-2,-4*, which could potentially repress translation of  
319 transcripts important for late LS development and/or the subsequent transition to the ABS.  
320 Unfortunately, this possibility will be exceedingly difficult to test in the absence of robust global

321 proteomic analysis of the early LS parasite. Nonetheless, our data, coupled with recent RNA-seq  
322 and proteomic studies of the more accessible late LS, can provide a starting point to address this  
323 question (8, 33).

324 Previous work examining the transcriptional changes of axenically grown early LS *P. vivax*  
325 identified upregulation of calcium-related proteins (RACK1) and RNA-binding proteins (*ALBA1*,  
326 -2 and -4) (34). We saw upregulation of the *P. berghei* orthologs of these genes as well as hundreds  
327 of other genes, dramatically expanding the dataset for genes upregulated at this stage (**Figure S5**).  
328 For example, we found *LYTB* is upregulated at 2 and 4 hpi, indicating isoprenoids may be  
329 important at this time. While the FASII and *de novo* heme biosynthesis pathways have been  
330 genetically and chemically validated as essential to the late liver stages, less is known about  
331 isoprenoid biosynthesis during the early liver stages (35, 36). When intracellular sporozoites  
332 metamorphose to replication-competent trophozoites, most organelles are expelled at the  
333 exclusion of the nucleus, mitochondrion, and apicoplast (10). Thus, it is plausible that the  
334 apicoplast serves an important metabolic role with isoprenoids in the liver stages of infection.  
335 Unfortunately, the use of isoprenoid biosynthesis inhibitors has yielded inconclusive results about  
336 its function during the LS (37, 38), emphasizing the need for future genetic studies to elucidate the  
337 role of isoprenoid biosynthesis throughout intrahepatic development. Thus, we anticipate our data  
338 will be useful to guide future reverse genetic and functional studies to investigate the role of  
339 *Plasmodium* genes with important early- and mid-LS functions.

340 Our understanding of *Plasmodium* LS biology still lags behind that of other parasite life  
341 cycle stages, hindering the development of much-needed prophylactic measures to combat malaria.  
342 Our work represents a window into the previously undescribed transcriptome of the early LS upon  
343 host cell infection and offers a comprehensive view of the *Plasmodium* LS. Future studies

344 expanding on our analysis and validating time-specific LS genes will further advance our  
345 molecular understanding of this critical step in the *Plasmodium* life cycle.

346

## 347 **MATERIALS AND METHODS**

348

349 **Parasites.** Sporozoites were freshly harvested prior to experiments from dissected salivary glands  
350 of *Anopheles stephensi* mosquitoes infected with *P. berghei* ANKA stably expressing a green  
351 fluorescent protein (GFP) purchased from the New York University Langone Medical Center  
352 Insectary.

353

354 **Cell culture.** HepG2 were purchased from ATCC and HuH7 cells were a kind gift from Dr. Peter  
355 Sorger (Harvard Medical School). Hepatocytes used for *P. berghei* infections were maintained in  
356 Dulbecco's Modified Eagle Medium (DMEM) with L-glutamine (Gibco) supplemented with 10%  
357 heat-inactivated fetal bovine serum (HI-FBS) (v/v) (Sigma-Aldrich) and 1% antibiotic-  
358 antimycotic (Thermo Fisher Scientific) in a standard tissue culture incubator (37°C, 5% CO<sub>2</sub>).

359

360 **Sample collection for RNA-seq.** Infected hepatoma cells were collected as previously described  
361 (39). Briefly, T25 flasks were seeded with  $3 \times 10^5$  HepG2 or  $8 \times 10^4$  HuH7 cells. About 24 hours  
362 after seeding, cells were infected with  $1 \times 10^5$  GFP-expressing *P. berghei*-ANKA sporozoites.  
363 Infected cells and uninfected controls were sorted directly into RNA lysis buffer (Clontech) using  
364 the BD FACSAria II cell sorter (BD Biosciences) at the Duke Human Vaccine Institute. Sytox  
365 blue was used as a live/dead cell indicator (Thermo Fisher Scientific). Infected cells were collected  
366 by sorting of the GFP, and gated compared to uninfected hepatoma cells. RNA was extracted using



367 SMART-seq v4 Ultra Low Input RNA Kit for Sequencing (Clontech) and libraries were prepared  
368 at the Duke Next Generation Sequencing Core Facility and sequenced on the Illumina HiSeq 4000  
369 as 50 base pair single-end reads. Samples (4–5) were pooled on each flow cell lane.

370

371 **RNA-seq and differential expression analysis.** RNA-seq data were processed using the  
372 TrimGalore toolkit (40) which employs Cutadapt (41) to trim low-quality bases and Illumina  
373 sequencing adapters from the 3' end of the reads. Only reads that were 20 nt or longer after  
374 trimming were kept for further analysis. Reads were mapped to a combination of the GRCh37v75  
375 (42) version of the human genome and the PbANKAv3 of the *P. berghei* genome using the STAR  
376 RNA-seq alignment tool (43). Reads were kept for subsequent analysis if they mapped to a single  
377 genomic location. All samples mapping >1 million reads to the *P. berghei* genome were used for  
378 a preliminary analysis. Gene counts were compiled using the HTSeq tool (44). Only *P. berghei*  
379 genes that had at least 10 reads in any given library were used in subsequent analysis.  
380 Normalization and differential expression were carried out using the DESeq2 (45) Bioconductor  
381 (46) package with the R statistical programming environment (47). The false discovery rate was  
382 calculated to control for multiple hypothesis testing. When calculating the differential expression  
383 between genes at each time point relative to the control, the cell type and sequencing batch were  
384 included as cofactors in the model.

385 Spearman correlations between published *P. berghei* RNA-seq datasets and our own were  
386 calculated and plotted using the *cor* function in the *stats* R package.

387

388 **Clustering analysis.** To determine the different patterns of gene expression across all groups of  
389 samples, we first identified genes that showed differential expression in at least one of the

390 comparisons performed (FDR  $\leq$  5%). The genes were clustered across all samples by a  
391 correlation distance using complete linkage after z-score transformation. The *NbClust* (48)  
392 package was used to separate the gene expression across all samples into distinct clusters.

393 De novo motif discovery was performed using DREME from the MEME suite (23). For  
394 each cluster the input data set was the upstream 1000 kb region of each gene within that cluster,  
395 and the negative set was the upstream region of genes that were not in that cluster. The analysis  
396 was run in discriminative mode, scanning the given strand only, with the predicted motif size of  
397 4–10 bp and cut-off E value of 0.05. The top most enriched motif for each cluster was then  
398 analyzed with TOMTOM (49) to compare to previously *in silico* discovered motifs (50).

399 The correlation matrix was generated in PRISM by calculating the Pearson correlation  
400 between each AP2 transcription factor and the average fold change expression for all the genes in  
401 each cluster.

402

403 **Gene Ontology (GO).** GO analyses for each cluster were performed using the GO enrichment tool  
404 of Biological Processes in PlasmoDB (51) with a cutoff of  $p < 0.01$ . The number of genes from the  
405 cluster in each of the representative top-scoring GO terms (lowest  $p$ -values) were plotted.

406

## 407 **ACKNOWLEDGEMENTS**

408 This work is funded by the NIH (DP2AI138239, to E.R.D), the CM Hauser Fellowship  
409 (M.T.M), and the NSF (DGE-1644868, to K.S.). The content of this study is solely the  
410 responsibility of the authors and does not necessarily represent the official views of the NIH.

411 We thank Prof. Ana Rodriguez and Sandra Gonzalez from the NYU Insectary for providing  
412 *Plasmodium*-infected mosquitoes, David Corcoran from the Duke Genomic Analysis and

413 Bioinformatics (GCB) Core Facility, the DHVI Flow Cytometry Core Facility, and Joseph Saelens.  
414 We also thank Prof. Photini Sinnis, Amanda Balaban, and the JHMRI Insectary and Parasitology  
415 Core Facilities for their help. We thank Luisa Toro Moreno for data managing support, and Profs.  
416 Jen-Tsan Ashley Chi and Steven Haase for useful discussions.

417

#### 418 **Author contributions**

419 Conception or design of the work— M.T-M, K.S, D.P, E.R.D

420 Data collection—K.S, D.P, E.R.D

421 Data analysis and interpretation— M.T-M, K.S, T.S

422 Drafting the article— M.T-M

423 Critical revision and contributions to the article— K.S, E.R.D

424 Final approval of the version to be published— M.T-M, K.S, T.S, D.P, E.R.D

425

#### 426 **REFERENCES**

427

- 428 1. Prudêncio M, Rodriguez A, Mota MM. 2006. The silent path to thousands of merozoites:  
429 the Plasmodium liver stage. *Nat Rev Microbiol* 4:849–856.
- 430 2. Aly ASI, Vaughan AM, Kappe SHI. 2009. Malaria Parasite Development in the Mosquito  
431 and Infection of the Mammalian Host. *Annu Rev Microbiol* 63:195–221.
- 432 3. World Health Organization. 2019. World Malaria Report.
- 433 4. Josling GA, Williamson KC, Llinás M. 2018. Regulation of Sexual Commitment and  
434 Gametocytogenesis in Malaria Parasites. *Annu Rev Microbiol* 72:501–519.
- 435 5. Tarun AS, Peng X, Dumpit RF, Ogata Y, Silva-Rivera H, Camargo N, Daly TM, Bergman

- 436 LW, Kappe SHI. 2008. A combined transcriptome and proteome survey of malaria parasite  
437 liver stages. *Proc Natl Acad Sci U S A* 105:305–10.
- 438 6. Bertschi NL, Voorberg-Van der Wel A, Zeeman AM, Schuierer S, Nigsch F, Carbone W,  
439 Knehr J, Gupta DK, Hofman SO, van der Werff N, Nieuwenhuis I, Klooster E, Faber BW,  
440 Flannery EL, Mikolajczak SA, Chuenchob V, Shrestha B, Beibel M, Bouwmeester T,  
441 Kangwanrangsang N, Sattabongkot J, Diagona TT, Kocken CHM, Roma G. 2018.  
442 Transcriptomic analysis reveals reduced transcriptional activity in the malaria parasite  
443 *Plasmodium cynomolgi* during progression into dormancy. *Elife* 7:e41081.
- 444 7. Cubi R, Vembar SS, Biton A, Franetich JF, Bordessoulles M, Sossau D, Zanghi G, Bosson-  
445 Vanga H, Benard M, Moreno A, Dereuddre-Bosquet N, Le Grand R, Scherf A, Mazier D.  
446 2017. Laser capture microdissection enables transcriptomic analysis of dividing and  
447 quiescent liver stages of *Plasmodium* relapsing species. *Cell Microbiol* 19:e12735.
- 448 8. Caldelari R, Dogga S, Schmid MW, Franke-Fayard B, Janse CJ, Soldati-Favre D, Heussler  
449 V. 2019. Transcriptome analysis of *Plasmodium berghei* during exo-erythrocytic  
450 development. *Malar J* 18.
- 451 9. Howick VM, Russell AJC, Andrews T, Heaton H, Reid AJ, Natarajan K, Butungi H,  
452 Metcalf T, Verzier LH, Rayner JC, Berriman M, Herren JK, Billker O, Hemberg M, Talman  
453 AM, Lawniczak MKN. 2019. The Malaria Cell Atlas: Single parasite transcriptomes across  
454 the complete *Plasmodium* life cycle. *Science* (80- ) 365:eaaw2619.
- 455 10. Jayabalasingham B, Bano N, Coppens I. 2010. Metamorphosis of the malaria parasite in the  
456 liver is associated with organelle clearance. *Cell Res* 20:1043–1059.
- 457 11. Bando H, Pradipta A, Iwanaga S, Okamoto T, Okuzaki D, Tanaka S, Vega-Rodríguez J,  
458 Lee Y, Ma JS, Sakaguchi N, Soga A, Fukumoto S, Sasai M, Matsuura Y, Yuda M, Jacobs-

- 459 Lorena M, Yamamoto M. 2019. CXCR4 regulates Plasmodium development in mouse and  
460 human hepatocytes. *J Exp Med* 216:1733–1748.
- 461 12. Kaiser K, Camargo N, Kappe SHI. 2003. Transformation of sporozoites into early  
462 exoerythrocytic malaria parasites does not require host cells. *J Exp Med* 197:1045–1050.
- 463 13. Doi Y, Shinzawa N, Fukumoto S, Okano H, Kanuka H. 2011. Calcium signal regulates  
464 temperature-dependent transformation of sporozoites in malaria parasite development. *Exp*  
465 *Parasitol* 128:176–180.
- 466 14. Prudêncio M, Rodrigues CD, Ataíde R, Mota MM. 2008. Dissecting in vitro host cell  
467 infection by Plasmodium sporozoites using flow cytometry. *Cell Microbiol* 10:218–224.
- 468 15. Risco-Castillo V, Topçu S, Marinach C, Manzoni G, Bigorgne AE, Briquet S, Baudin X,  
469 Lebrun M, Dubremetz J-F, Silvie O, Amino R, Giovannini D, Thiberge S, Gueirard P,  
470 Boisson B, Dubremetz J-F, Prévost M-C, Ishino T, Yuda M, Ménard R, Bano N, Romano  
471 JD, Jayabalasingham B, Coppens I, Besteiro S, Dubremetz JF, Lebrun M, Bhanot P,  
472 Schauer K, Coppens I, Nussenzweig V, Charoenvit Y, Leef MF, Yuan LF, Sedegah M,  
473 Beaudoin RL, Deligianni E, Morgan RN, Bertuccini L, Wirth CC, Monerri NCS de, Spanos  
474 L, Blackman MJ, Louis C, Pradel G, Siden-Kiamos I, Dunstone MA, Tweten RK, Frevert  
475 U, Engelmann S, Zougbedé S, Stange J, Ng B, Matuschewski K, Liebes L, Yee H, Garg S,  
476 Agarwal S, Kumar S, Yazdani SS, Chitnis CE, Singh S, Hamon MA, Ribet D, Stavru F,  
477 Cossart P, Ishino T, Yano K, Chinzei Y, Yuda M, Ishino T, Chinzei Y, Yuda M, Janse CJ,  
478 Ramesar J, Waters AP, Kafsack BFC, Pena JDO, Coppens I, Ravindran S, Boothroyd JC,  
479 Carruthers VB, Kaiser K, Camargo N, Coppens I, Morrisey JM, Vaidya AB, Kappe SH,  
480 Kariu T, Ishino T, Yano K, Chinzei Y, Yuda M, Manzoni G, Briquet S, Risco-Castillo V,  
481 Gaultier C, Topçu S, Ivănescu ML, Franetich JF, Hoareau-Coudert B, Mazier D, Silvie O,

482 Ménéard R, Tavares J, Cockburn I, Markus M, Zavala F, Amino R, Mordue DG, Desai N,  
483 Dustin M, Sibley LD, Moreira CK, Templeton TJ, Lavazec C, Hayward RE, Hobbs CV,  
484 Kroeze H, Janse CJ, Waters AP, Sinnis P, Coppi A, Mota MM, Pradel G, Vanderberg JP,  
485 Hafalla JC, Frevert U, Nussenzweig RS, Nussenzweig V, Rodríguez A, Mota MM, Hafalla  
486 JC, Rodriguez A, Prudêncio M, Rodrigues CD, Ataíde R, Mota MM, Ramakrishnan C,  
487 Delves MJ, Lal K, Blagborough AM, Butcher G, Baker KW, Sinden RE, Risco-Castillo V,  
488 Topçu S, Son O, Briquet S, Manzoni G, Silvie O, Roiko MS, Svezhova N, Carruthers VB,  
489 Schuerch DW, Wilson-Kubalek EM, Tweten RK, Silvie O, Rubinstein E, Franetich J-F,  
490 Prenant M, Belnoue E, Rénia L, Hannoun L, Eling W, Levy S, Boucheix C, Mazier D, Silvie  
491 O, Greco C, Franetich JF, Dubart-Kupperschmitt A, Hannoun L, Gemert GJ van, Sauerwein  
492 RW, Levy S, Boucheix C, Rubinstein E, Mazier D, Silvie O, Charrin S, Billard M, Franetich  
493 JF, Clark KL, Gemert GJ van, Sauerwein RW, Dautry F, Boucheix C, Mazier D, Rubinstein  
494 E, Silvie O, Franetich JF, Boucheix C, Rubinstein E, Mazier D, Talman AM, Lacroix C,  
495 Marques SR, Blagborough AM, Carzaniga R, Ménéard R, Sinden RE, Tavares J, Formaglio  
496 P, Thiberge S, Mordelet E, Rooijen N Van, Medvinsky A, Ménéard R, Amino R, Tsuji M,  
497 Mattei D, Nussenzweig RS, Eichinger D, Zavala F, Wirth CC, Glushakova S, Scheuermayer  
498 M, Repnik U, Garg S, Schaack D, Kachman MM, Weißbach T, Zimmerberg J, Dandekar  
499 T, al. et, Yamauchi LM, Coppi A, Snounou G, Sinnis P, Yoshimori T, Yamamoto A,  
500 Moriyama Y, Futai M, Tashiro Y, Zhao Y, Marple AH, Ferguson DJP, Bzik DJ, Yap GS,  
501 Zuber MX, Strittmatter SM, Fishman MC. 2015. Malaria Sporozoites Traverse Host Cells  
502 within Transient Vacuoles. *Cell Host Microbe* 18:593–603.

503 16. Vaughan AM, Kappe SHI. 2017. Malaria parasite liver infection and exoerythrocytic  
504 biology. *Cold Spring Harb Perspect Med* 7:a025486.

- 505 17. Siregar JE, Kurisu G, Kobayashi T, Matsuzaki M, Sakamoto K, Mi-ichi F, Watanabe Y,  
506 Hirai M, Matsuoka H, Syafruddin D, Marzuki S, Kita K. 2015. Direct evidence for the  
507 atovaquone action on the Plasmodium cytochrome bc 1 complex. *Parasitol Int* 64:295–300.
- 508 18. Janse CJ, Kroeze H, van Wigcheren A, Mededovic S, Fonager J, Franke-Fayard B, Waters  
509 AP, Khan SM. 2011. A genotype and phenotype database of genetically modified malaria-  
510 parasites. *Trends Parasitol*.
- 511 19. Iwanaga S, Kaneko I, Kato T, Yuda M. 2012. Identification of an AP2-family Protein That  
512 Is Critical for Malaria Liver Stage Development. *PLoS One* 7:e47557.
- 513 20. Yuda M, Iwanaga S, Kaneko I, Kato T. 2015. Global transcriptional repression: An initial  
514 and essential step for Plasmodium sexual development. *Proc Natl Acad Sci U S A*  
515 112:12824–12829.
- 516 21. Modrzynska K, Pfander C, Chappell L, Yu L, Suarez C, Dundas K, Gomes AR, Goulding  
517 D, Rayner JC, Choudhary J, Billker O. 2017. A Knockout Screen of ApiAP2 Genes Reveals  
518 Networks of Interacting Transcriptional Regulators Controlling the Plasmodium Life Cycle.  
519 *Cell Host Microbe* 21:11–22.
- 520 22. Biljon R van, Wyk R van, Painter H, Orchard L, Reader J, Niemand J, Llinas M, Birkholtz  
521 L-M. 2019. Hierarchical transcriptional control regulates Plasmodium falciparum sexual  
522 differentiation. *bioRxiv* 633222.
- 523 23. Bailey TL. 2011. DREME: Motif discovery in transcription factor ChIP-seq data.  
524 *Bioinformatics* 27:1653–1659.
- 525 24. Otto TD, Böhme U, Jackson AP, Hunt M, Franke-Fayard B, Hoeijmakers WAM, Religa  
526 AA, Robertson L, Sanders M, Ogun SA, Cunningham D, Erhart A, Billker O, Khan SM,  
527 Stunnenberg HG, Langhorne J, Holder AA, Waters AP, Newbold CI, Pain A, Berriman M,

- 528 Janse CJ. 2014. A comprehensive evaluation of rodent malaria parasite genomes and gene  
529 expression. *BMC Med* 12:86.
- 530 25. Modrzynska K, Pfander C, Chappell L, Yu L, Suarez C, Dundas K, Gomes AR, Goulding  
531 D, Rayner JC, Choudhary J, Billker O. 2017. A Knockout Screen of ApiAP2 Genes Reveals  
532 Networks of Interacting Transcriptional Regulators Controlling the Plasmodium Life Cycle.  
533 *Cell Host Microbe* 21:11–22.
- 534 26. LaMonte GM, Orjuela-Sanchez P, Calla J, Wang LT, Li S, Swann J, Cowell AN, Zou BY,  
535 Abdel-Haleem Mohamed AM, Villa Galarce ZH, Moreno M, Tong Rios C, Vinetz JM,  
536 Lewis N, Winzeler EA. 2019. Dual RNA-seq identifies human mucosal immunity protein  
537 Mucin-13 as a hallmark of Plasmodium exoerythrocytic infection. *Nat Commun* 10:488.
- 538 27. Baumgarten S, Bryant JM, Sinha A, Reyser T, Preiser PR, Dedon PC, Scherf A. 2019.  
539 Transcriptome-wide dynamics of extensive m6A mRNA methylation during Plasmodium  
540 falciparum blood-stage development. *Nat Microbiol* 1–14.
- 541 28. Viaud J, Zeghouf M, Barelli H, Zeeh J-C, Padilla A, Guibert B, Chardin P, Royer CA,  
542 Cherfils J, Chavanieu A. 2007. Structure-based discovery of an inhibitor of Arf activation  
543 by Sec7 domains through targeting of protein-protein complexes. *Proc Natl Acad Sci U S*  
544 *A* 104:10370–5.
- 545 29. Yeoh LM, Goodman CD, Mollard V, McHugh E, Lee VV, Sturm A, Cozijnsen A,  
546 McFadden GI, Ralph SA. 2019. Alternative splicing is required for stage differentiation in  
547 malaria parasites. *Genome Biol* 20:151.
- 548 30. Lasonder E, Rijpma SR, Van Schaijk BCL, Hoeijmakers WAM, Kensche PR, Gresnigt MS,  
549 Italiaander A, Vos MW, Woestenenk R, Bousema T, Mair GR, Khan SM, Janse CJ, Bártfai  
550 R, Sauerwein RW. 2016. Integrated transcriptomic and proteomic analyses of *P. Falciparum*



- 551 gametocytes: Molecular insight into sex-specific processes and translational repression.  
552 Nucleic Acids Res 44:6087–6101.
- 553 31. Muller I, Jex AR, Kappe SHI, Mikolajczak SA, Sattabongkot J, Patrapuvich R, Lindner S,  
554 Flannery EL, Koepfli C, Ansell B, Lerch A, Emery-Corbin SJ, Charnaud S, Smith J,  
555 Merrienne N, Swearingen KE, Moritz RL, Petter M, Duffy MF, Chuenchob V. 2019.  
556 Transcriptome and histone epigenome of Plasmodium vivax salivary-gland sporozoites  
557 point to tight regulatory control and mechanisms for liver-stage differentiation in relapsing  
558 malaria. Int J Parasitol 49:501–513.
- 559 32. Lindner SE, Swearingen KE, Shears MJ, Walker MP, Vrana EN, Hart KJ, Minns AM,  
560 Sinnis P, Moritz RL, Kappe SHI. 2019. Transcriptomics and proteomics reveal two waves  
561 of translational repression during the maturation of malaria parasite sporozoites. Nat  
562 Commun 10:4964.
- 563 33. Shears MJ, Sekhar Nirujogi R, Swearingen KE, Renuse S, Mishra S, Jaipal Reddy P, Moritz  
564 RL, Pandey A, Sinnis P. 2019. Proteomic Analysis of Plasmodium Merosomes: The Link  
565 between Liver and Blood Stages in Malaria. J Proteome Res 18:3404–3418.
- 566 34. Roth A, Adapa SR, Zhang M, Liao X, Saxena V, Goffe R, Li S, Ubalee R, Saggi GS, Pala  
567 ZR, Garg S, Davidson S, Jiang RHY, Adams JH. 2018. Unraveling the Plasmodium vivax  
568 sporozoite transcriptional journey from mosquito vector to human host. Sci Rep 8:12183.
- 569 35. Nagaraj VA, Sundaram B, Varadarajan NM, Subramani PA, Kalappa DM, Ghosh SK,  
570 Padmanaban G. 2013. Malaria parasite-synthesized heme is essential in the mosquito and  
571 liver stages and complements host heme in the blood stages of infection. PLoS Pathog  
572 9:e1003522.
- 573 36. Rizopoulos Z, Matuschewski K, Haussig JM. 2016. Distinct prominent roles for enzymes

- 574 of *Plasmodium berghei* heme biosynthesis in sporozoite and liver stage maturation. *Infect*  
575 *Immun* 84:3252–3262.
- 576 37. Baumeister S, Wiesner J, Reichenberg A, Hintz M, Bietz S, Harb OS, Roos DS, Kordes M,  
577 Friesen J, Matuschewski K, Lingelbach K, Jomaa H, Seeber F. 2011. Fosmidomycin uptake  
578 into *Plasmodium* and *Babesia*-infected erythrocytes is facilitated by parasite-induced new  
579 permeability pathways. *PLoS One* 6:e19334.
- 580 38. Nair SC, Brooks CF, Goodman CD, Strurm A, McFadden GI, Sundriyal S, Anglin JL, Song  
581 Y, Moreno SNJ, Striepen B. 2011. Apicoplast isoprenoid precursor synthesis and the  
582 molecular basis of fosmidomycin resistance in *Toxoplasma gondii*. *J Exp Med* 208:1547–  
583 1559.
- 584 39. Posfai D, Sylvester K, Reddy A, Ganley JG, Wirth J, Cullen QE, Dave T, Kato N, Dave SS,  
585 Derbyshire ER. 2018. *Plasmodium* parasite exploits host aquaporin-3 during liver stage  
586 malaria infection. *PLOS Pathog* 14:e1007057.
- 587 40. Krueger F. 2017. Babraham Bioinformatics - Trim Galore! Version 044.
- 588 41. Martin M. 2011. Cutadapt removes adapter sequences from high-throughput sequencing  
589 reads. *EMBnet.journal* 17:10.
- 590 42. Kersey PJ, Staines DM, Lawson D, Kulesha E, Derwent P, Humphrey JC, Hughes DST,  
591 Keenan S, Kerhornou A, Koscielny G, Langridge N, McDowall MD, Megy K, Maheswari  
592 U, Nuhn M, Paulini M, Pedro H, Toneva I, Wilson D, Yates A, Birney E. 2012. Ensembl  
593 Genomes: An integrative resource for genome-scale data from non-vertebrate species.  
594 *Nucleic Acids Res* 40:D91-7.
- 595 43. Dobin A, Davis CA, Schlesinger F, Drenkow J, Zaleski C, Jha S, Batut P, Chaisson M,  
596 Gingeras TR. 2013. STAR: Ultrafast universal RNA-seq aligner. *Bioinformatics* 29:15–21.

- 597 44. Anders S. 2010. HTSeq: Analysing high-throughput sequencing data with Python. ... [embl](http://embl.de/users/anders/HTSeq/doc/overview.html)  
598 [de/users/anders/HTSeq/doc/overview.html](http://embl.de/users/anders/HTSeq/doc/overview.html).
- 599 45. Love MI, Huber W, Anders S. 2014. Moderated estimation of fold change and dispersion  
600 for RNA-seq data with DESeq2. *Genome Biol* 15:550.
- 601 46. Huber W, Carey VJ, Gentleman R, Anders S, Carlson M, Carvalho BS, Bravo HC, Davis  
602 S, Gatto L, Girke T, Gottardo R, Hahne F, Hansen KD, Irizarry RA, Lawrence M, Love MI,  
603 MaCdonald J, Obenchain V, Oleš AK, Pagès H, Reyes A, Shannon P, Smyth GK,  
604 Tenenbaum D, Waldron L, Morgan M. 2015. Orchestrating high-throughput genomic  
605 analysis with Bioconductor. *Nat Methods* 12:115–121.
- 606 47. The R Foundation. 2018. R: The R Project for Statistical Computing.
- 607 48. Charrad M, Ghazzali N, Boiteau V, Niknafs A. 2015. NbClust: An R Package for  
608 Determining the Relevant Number of Clusters in a Data Set. *J Stat Softw* 61:1–36.
- 609 49. Gupta S, Stamatoyannopoulos JA, Bailey TL, Noble W. 2007. Quantifying similarity  
610 between motifs. *Genome Biol* 8:R24.
- 611 50. Campbell TL, De Silva EK, Olszewski KL, Elemento O, Llinás M. 2010. Identification and  
612 genome-wide prediction of DNA binding specificities for the ApiAP2 family of regulators  
613 from the malaria parasite. *PLoS Pathog* 6:e1001165.
- 614 51. Collaborative TPGD. 2001. PlasmoDB: An integrative database of the *Plasmodium*  
615 *falciparum* genome. Tools for accessing and analyzing finished and unfinished sequence  
616 data. *Nucleic Acids Res* 29:66–69.
- 617 52. Voorberg-van der Wel A, Zeeman AM, van Amsterdam SM, van den Berg A, Klooster EJ,  
618 Iwanaga S, Janse CJ, van Gemert GJ, Sauerwein R, Beenhakker N, Koopman G, Thomas  
619 AW, Kocken CHM. 2013. Transgenic Fluorescent *Plasmodium cynomolgi* Liver Stages

- 620 Enable Live Imaging and Purification of Malaria Hypnozoite-Forms. PLoS One 8:e54888.
- 621 53. Gural N, Mancio-Silva L, Miller AB, Galstian A, Butty VL, Levine SS, Patrapuvich R,  
622 Desai SP, Mikolajczak SA, Kappe SHI, Fleming HE, March S, Sattabongkot J, Bhatia SN.  
623 2018. In Vitro Culture, Drug Sensitivity, and Transcriptome of Plasmodium Vivax  
624 Hypnozoites. Cell Host Microbe 23:395-406.e4.
- 625 54. Zanghì G, Vembar SS, Baumgarten S, Ding S, Guizetti J, Bryant JM, Mattei D, Jensen  
626 ATR, Rénia L, Goh YS, Sauerwein R, Hermsen CC, Franetich JF, Bordessoulles M, Silvie  
627 O, Soulard V, Scatton O, Chen P, Mecheri S, Mazier D, Scherf A. 2018. A Specific PfEMP1  
628 Is Expressed in *P. falciparum* Sporozoites and Plays a Role in Hepatocyte Infection. Cell  
629 Rep 22:2951–2963.
- 630 55. Voorberg-van der Wel A, Roma G, Gupta DK, Schuierer S, Nigsch F, Carbone W, Zeeman  
631 AM, Lee BH, Hofman SO, Faber BW, Knehr J, Pasini E, Kinzel B, Bifani P, Bonamy GMC,  
632 Bouwmeester T, Kocken CHM, Diagana TT. 2017. A comparative transcriptomic analysis  
633 of replicating and dormant liver stages of the relapsing malaria parasite *plasmodium*  
634 *cynomolgi*. Elife 6:e29605.
- 635
- 636
- 637
- 638
- 639
- 640
- 641
- 642

643 **FIGURES AND LEGENDS**

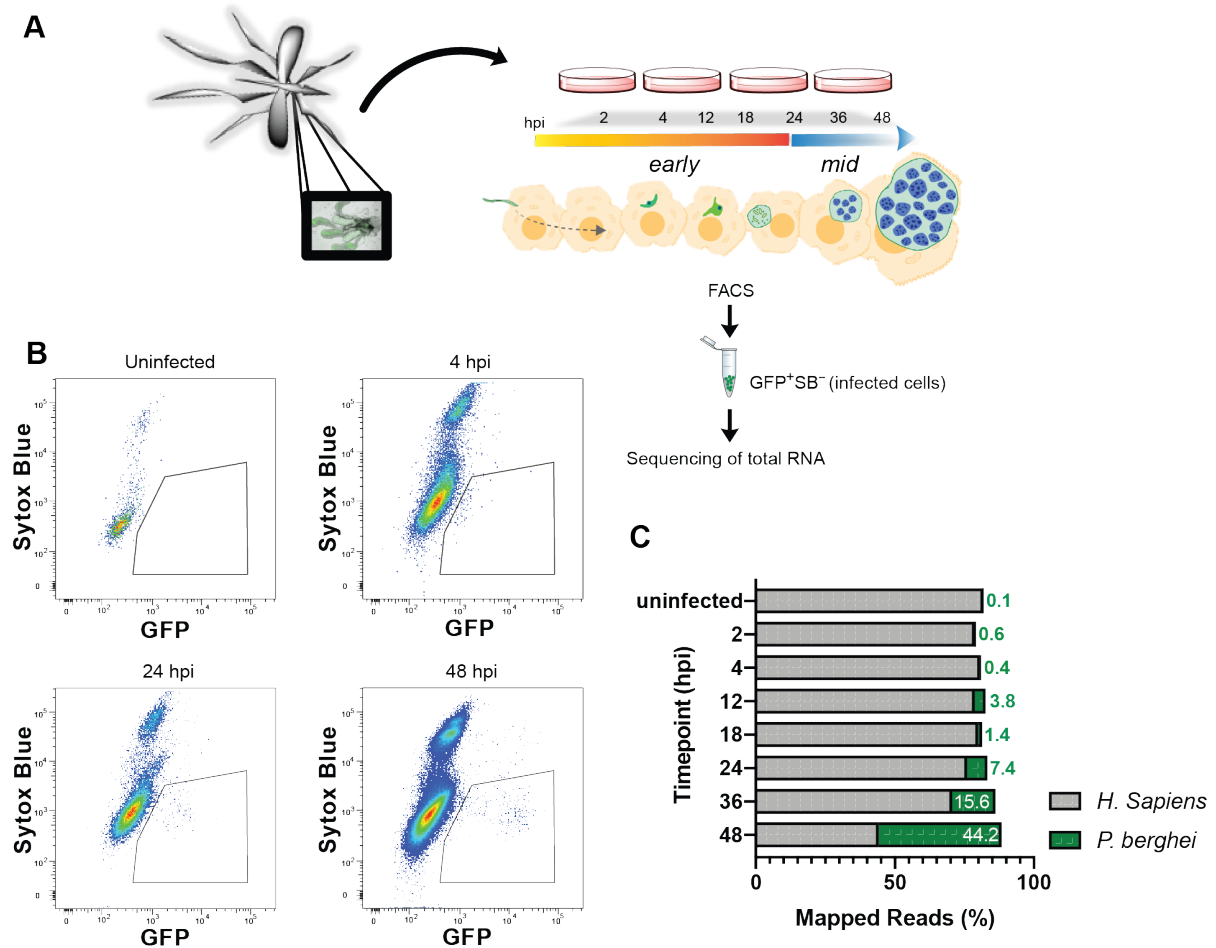

644

645 **Figure 1. Experimental design for RNA-seq of early and mid-stages of *P. berghei* liver**  
646 **infection. (A)** Experimental design schematic. Female *Anopheles* mosquitoes were dissected and  
647 GFP-expressing *P. berghei* sporozoites were harvested to infect HuH7 or HepG2 cells. Cells were  
648 harvested 2, 4, 12, 18, 24, 36 or 48 hpi and FACS-sorted to enrich viable *P. berghei*-infected cells  
649 for RNA collection. **(B)** Representative flow cytometry fluorescence dot plots indicating the  
650 population of GFP<sup>+</sup>SytoxBlue<sup>-</sup> cells that were collected at various time points. **(C)** Relative  
651 percentage of transcripts mapping to *P. berghei* or *H. sapiens* at various times post infection.

652 Uninfected samples correspond to naïve uninfected cells treated with debris from dissected male

653 *Anopheles* mosquito salivary glands. Data are median of 2–5 biological replicates.

654

655

656

657

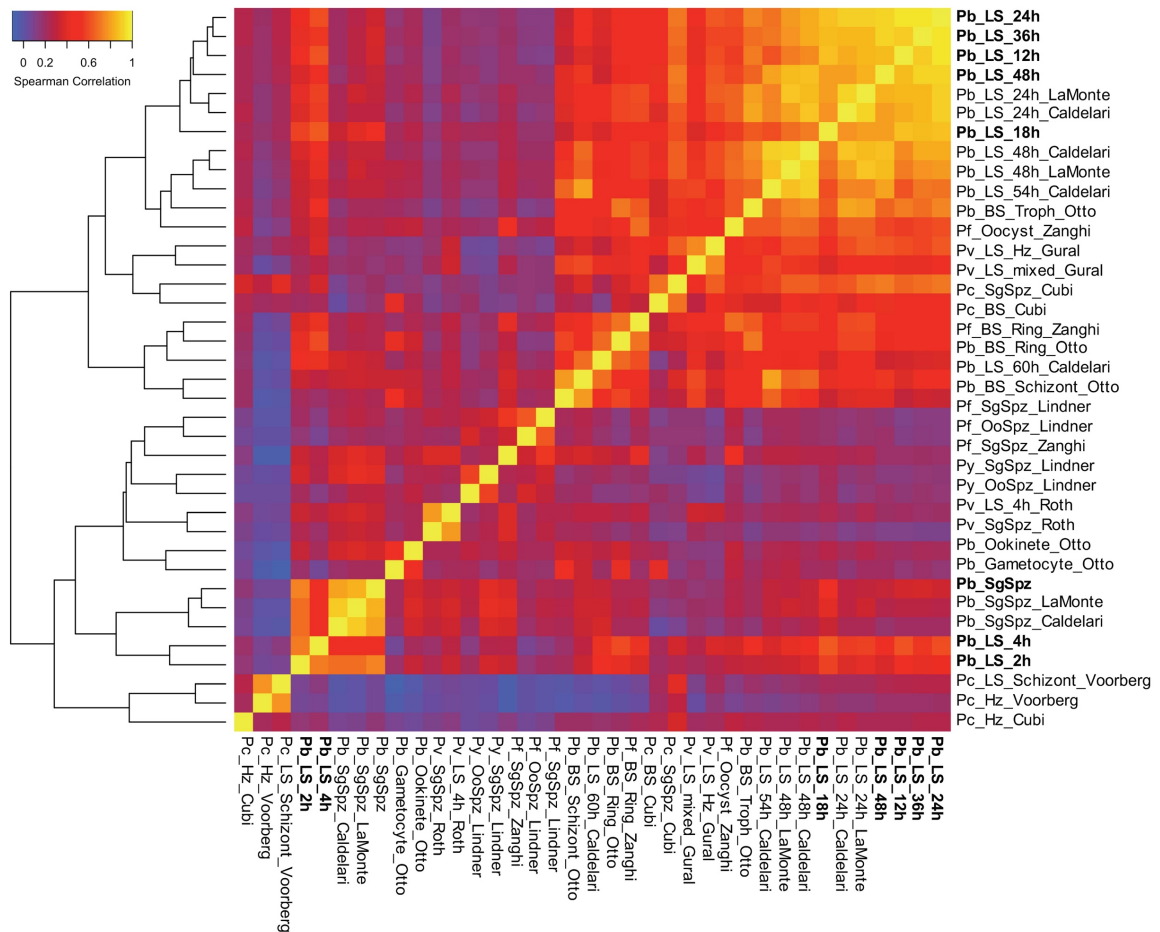

658

659 **Figure 2. Overview of *Plasmodium* transcriptome analyses.** Hierarchical clustering of gene  
660 expression datasets from different stages of the *Plasmodium* life cycle (7, 8, 26, 32, 34, 52–54).  
661 Datasets generated in this study are in bold. Clustering is based on Spearman correlation  
662 coefficients calculated and plotted using R. Refer to Table S1 for information regarding the  
663 datasets used to generate this figure.

664

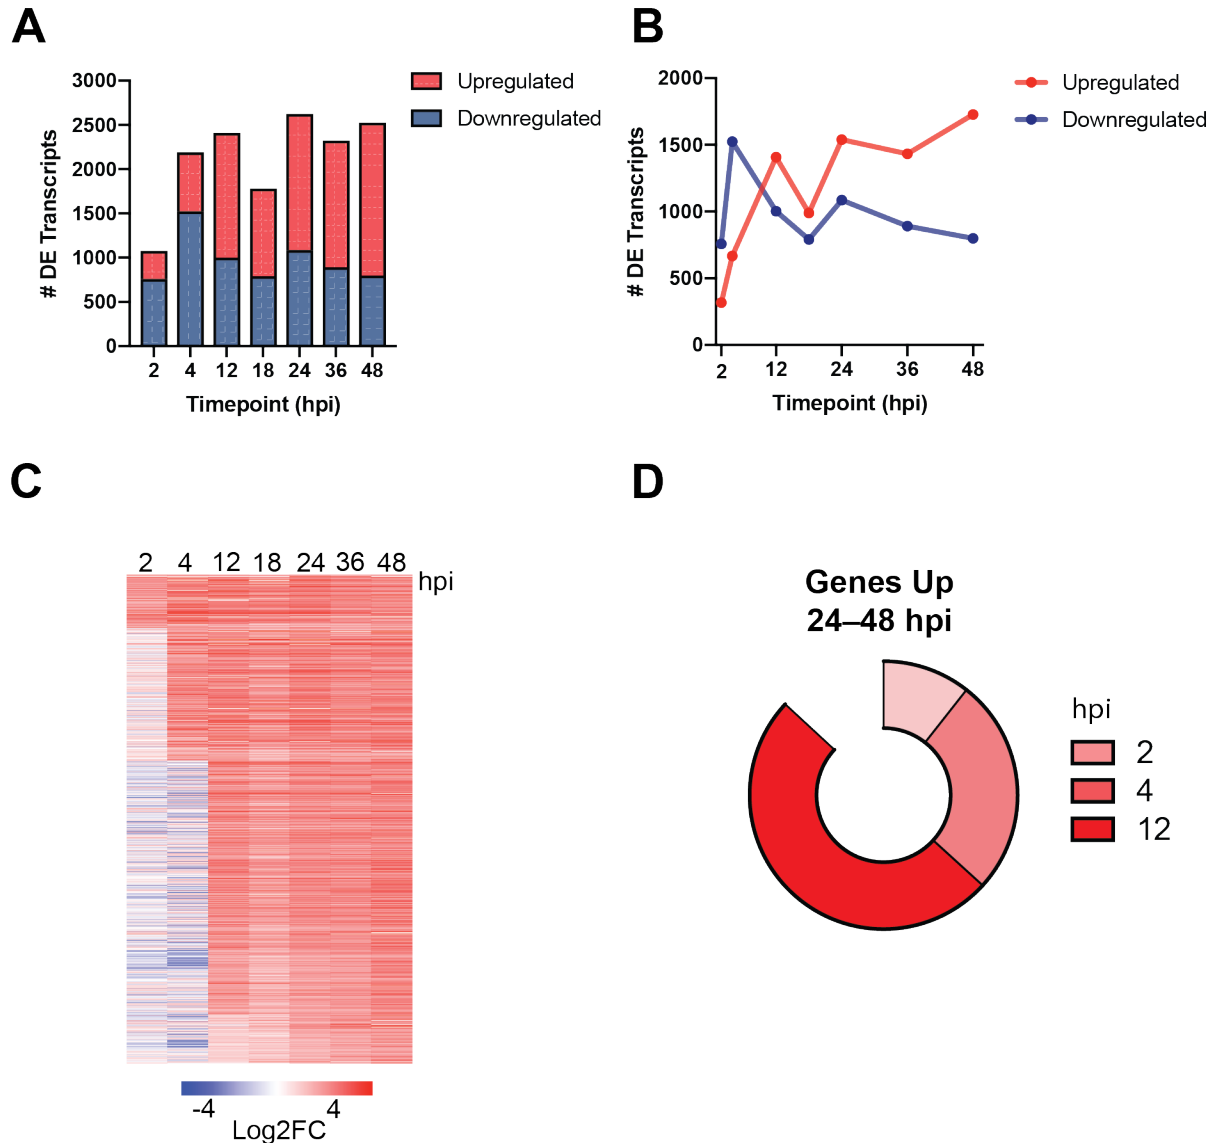

665

666 **Figure 3. Dynamic gene regulation throughout liver-stage *P. berghei* development.** Total (A)  
667 and upregulated (red)/ downregulated (blue) (B) differentially expressed (DE) transcripts ( $q <$   
668 0.01) shown at each time point. (C) Expression profiles of 1,197 genes upregulated at 24, 36 and  
669 48 hpi ordered based on the timepoint they were first observed to be upregulated. Expression is  
670 shown as the Log<sub>2</sub> fold change vs sporozoite samples. (D) The proportion of genes that are  
671 upregulated throughout late stage development (24, 36 and 48 hpi) are divided by when they are  
672 first observed to be upregulated (2, 4 or 12 hpi).



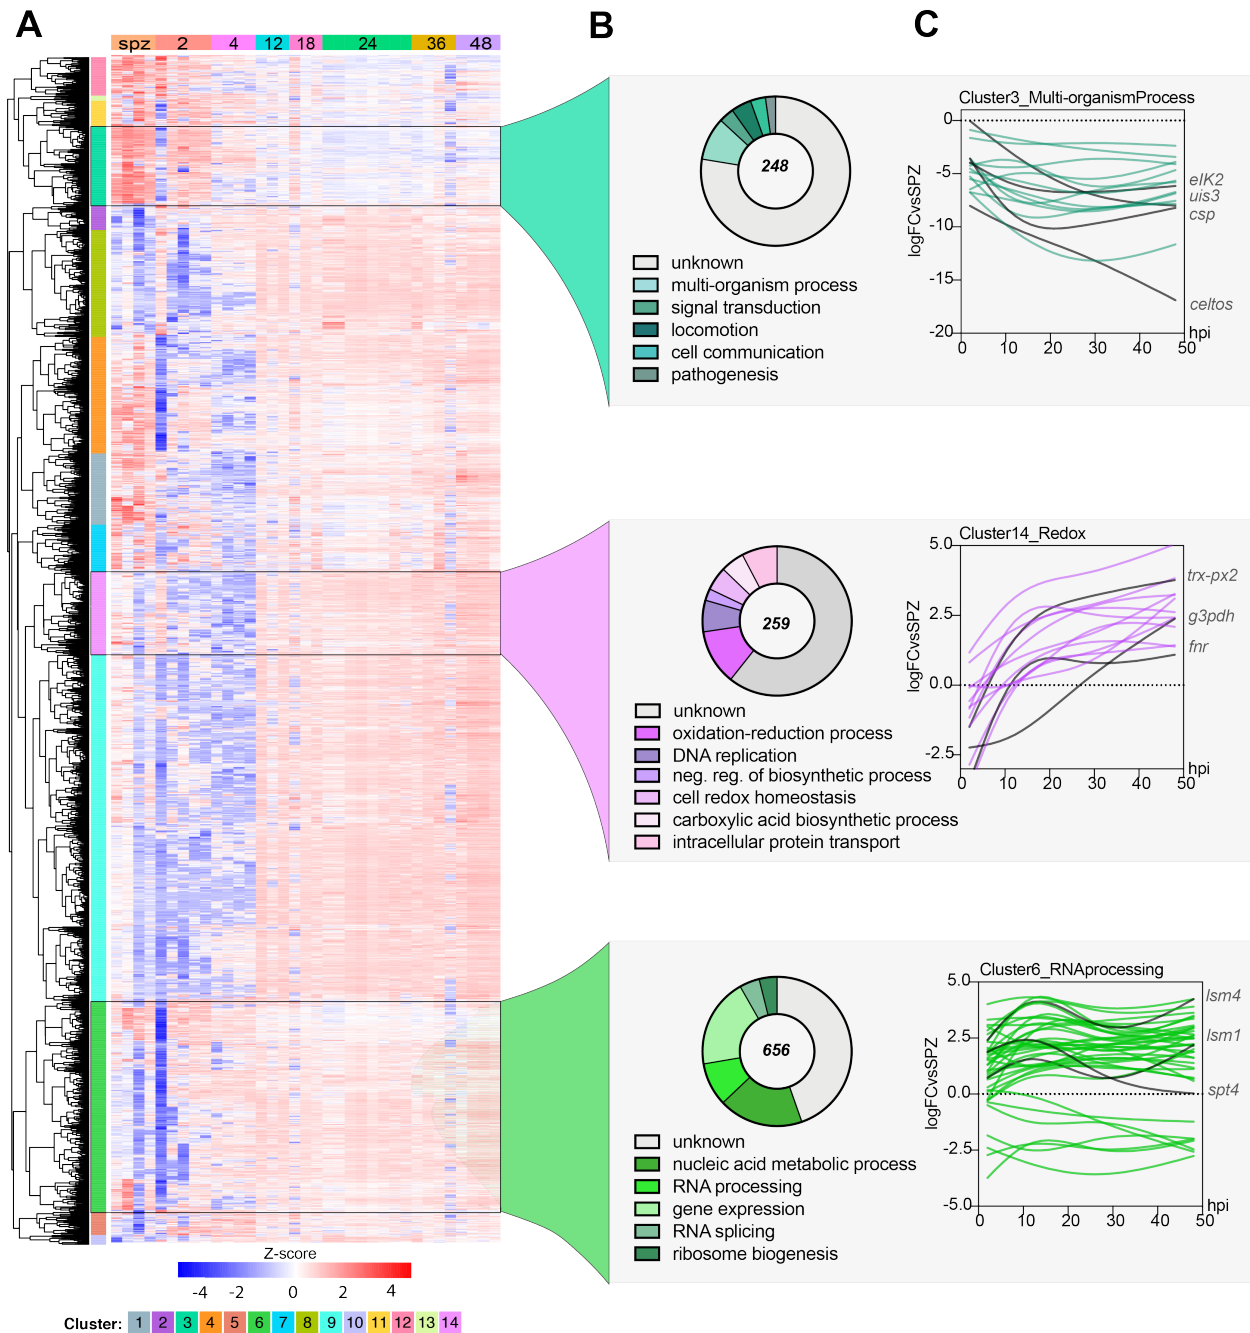

673

674 **Figure 4. Co-expression analysis identifies enriched processes during *P. berghei* development**

675 **in hepatocytes. (A)** Hierarchical clustering using a correlation distance with complete linkage of

676 all genes significant (FDR  $\leq$  5%) in at least one of the analyses. Gene expression is z-score

677 transformed. **(B)** GO Enrichment analysis (biological process) of enriched clusters 3, 14 and 6

678 shown. Representative GO terms ( $p < 0.01$ ) and their respective number of genes (pie chart) are

679 shown. Total number of genes in each cluster is shown at the center of the pie chart. (C) Spline  
680 models of gene expression data for all the genes in the top-scoring GO term in each cluster. Key  
681 genes in each group and their expression patterns are highlighted in red. Refer to **Data S3** for  
682 complete GO analysis of all clusters.

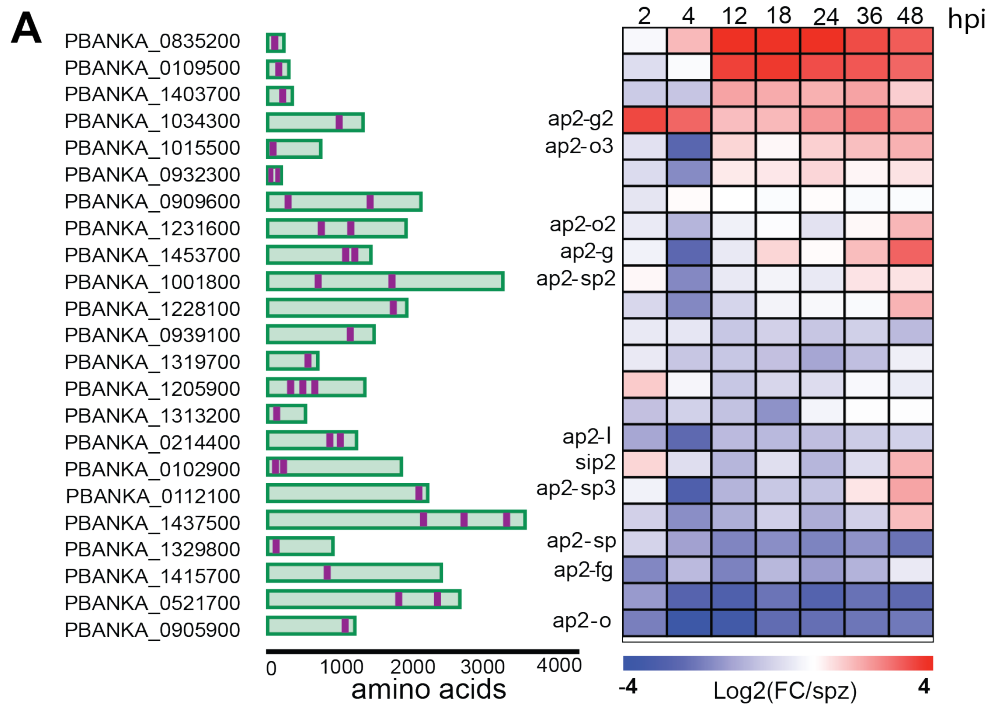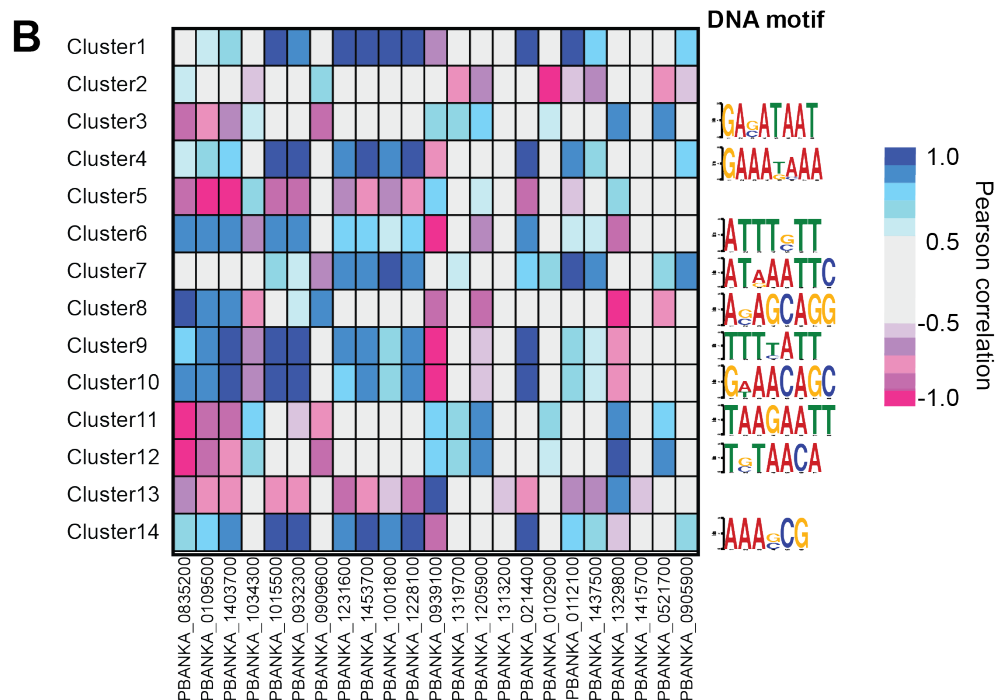

683

684 **Figure 5. Expression of *P. berghei* AP2 transcription factors in the liver stage.** (A) Gene IDs  
685 of the 26 AP2 transcription factors in the *Pb* genome, their respective protein architecture  
686 schematic (with AP2 displayed in purple) and their corresponding expression as the log<sub>2</sub> fold

687 change vs spz at each time point in the LS. **(B)** Heatmap of Pearson correlations between AP2  
688 transcription factors and the average expression of all genes in each cluster (left). The top most  
689 enriched DNA motif for each cluster discovered through the DREME pipeline is shown (right).  
690 Refer to **Data S3** for the complete set of motifs and their respective enrichment score.  
691  
692
